# Supplementary material for: A Hepatitis C Virus Infection Model with Time-Varying Drug Effectiveness: Solution and Analysis
Source: PubMed Central journal article supplement (PMC4125050; doi:10.1371/journal.pcbi.1003769), 2014-08-07
Supplement: pcbi.1003769.s003.pdf [file pcbi.1003769.s003.pdf]

**Table S1.** Modified Bessel function order  $\nu$  for the different treatment regimens in Table 1.  $\nu$  is the order of the modified Bessel functions  $I_\nu(x)$  and  $K_\nu(x)$  in the solution (11). The approximation to the analytic solution that we use depends on whether  $\nu < 1$  or  $\nu > 1$  (cf. (16)).

| <b>Treatment</b>                    | <b><math>\nu</math></b> |
|-------------------------------------|-------------------------|
| Telaprevir                          | 4.48                    |
| Mericitabine, qd 750 mg, flat       | 5.64                    |
| Mericitabine, qd 750 mg, non-flat   | 26.02                   |
| Mericitabine, qd 1500 mg, flat      | 5.64                    |
| Mericitabine, qd 1500 mg, non-flat  | 26.00                   |
| Mericitabine, bid 750 mg, flat      | 2.94                    |
| Mericitabine, bid 750 mg, non-flat  | 13.90                   |
| Mericitabine, bid 1500 mg, flat     | 2.94                    |
| Mericitabine, bid 1500 mg, non-flat | 13.90                   |
| Silibinin                           | 2.57                    |
| Danoprevir, 100 mg                  | 0.24                    |
| Danoprevir, 200 mg                  | 0.24                    |
| Danoprevir, 300 mg                  | 0.24                    |
| Sofosbuvir                          | 0.64                    |
